# Supplementary material
Source: PubMed Central journal article supplement (PMC7934083)
Supplement: jama-e213071-s002.pdf [file jama-e213071-s002.pdf]

## Supplemental Online Content

López-Medina E, López P, Hurtado IC, et al. Effect of ivermectin on time to resolution of symptoms among adults with mild COVID-19: a randomized clinical trial. *JAMA*. doi:10.1001/jama.2021.3071

**eTable 1.** Comparison of Demographic and Clinical Characteristics – As-Treated Population

**eTable 2.** Clinical Manifestations of Patients at Baseline – Primary Analysis Population

**eTable 3.** Comparison of Demographic and Clinical Characteristics Between the 75 Patients Receiving Ivermectin Who Were Excluded From Primary Analysis due to Error During Product Labeling and the Rest of the Cohort

**eTable 4.** Outcomes – As-Treated Population

**eTable 5.** Ordinal Scale Measure by Treatment Group and Study Visit – Primary Analysis Population

**eTable 6.** Ordinal Scale Measure by Treatment Group and Study Visit – As-Treated Population

**eTable 7.** Summary of Adverse Events – As-Treated Population

**eFigure 1.** Time to Resolution of Symptoms – As-Treated Population According to the Type of Placebo

**eFigure 2.** Time to Resolution of Symptoms – As-Treated Population

**eFigure 3.** Clinical Status on an 8-Point Ordinal Scale on Study Days 5, 8, 11 and 21 by Treatment Group – Primary Analysis Population

This supplemental material has been provided by the authors to give readers additional information about their work.

**eTable 1. Comparison of Demographic and Clinical Characteristics – As-Treated Population**

| <b>Characteristic</b>                             | <b>Ivermectin (N=275)</b> | <b>Placebo (N=198)</b> | <b>Differences (95% CI)<sup>a</sup></b> |
|---------------------------------------------------|---------------------------|------------------------|-----------------------------------------|
| Age, median (IQR) – yrs                           | 38 (29 to 49)             | 37 (28.7 to 49.2)      | 1.0 (-2.5 to 3.0)                       |
| Age Groups – No. (%)                              |                           |                        |                                         |
| <40 yr                                            | 159 (57.8)                | 112 (56.6)             | 1.2 (-7.8 to 10.3)                      |
| 40-64 yr                                          | 104 (37.8)                | 70 (35.3)              | 2.5 (-6.3 to 11.2)                      |
| ≥ 65 yr                                           | 12 (4.4)                  | 16 (8.1)               | -3.7 (-8.2 to 0.8)                      |
| Sex – No. (%)                                     |                           |                        |                                         |
| Male                                              | 112 (40.7)                | 89 (44.9)              | -4.2 (-13.3 to 4.8)                     |
| Female                                            | 163 (59.3)                | 109 (55.1)             | 4.2 (-4.8 to 13.3)                      |
| Race or ethnic group <sup>b</sup> – No. (%)       |                           |                        |                                         |
| Mixed Race                                        | 243 (88.4)                | 179 (90.4)             | -2.0 (-7.6 to 3.5)                      |
| Black or African American                         | 24 (8.7)                  | 16 (8.1)               | 0.6 (-4.4 to 5.7)                       |
| Colombian Native                                  | 8 (2.9)                   | 3 (1.5)                | 1.4 (-1.2 to 4.0)                       |
| History of BCG vaccination – No./n (%)            | 244/264 (92.4)            | 184/195 (94.5)         | -1.9 (-6.5 to 2.6)                      |
| Health Insurance – No. (%)                        |                           |                        |                                         |
| Private/semiprivate                               | 239 (86.9)                | 174 (87.9)             | -1.0 (-7.0 to 5.1)                      |
| Government subsidized                             | 33 (12.0)                 | 23 (11.6)              | 0.4 (-5.5 to 6-3)                       |
| Uninsured                                         | 3 (1.1)                   | 1 (0.5)                | 0.6 (-1.0 to 2.2)                       |
| No. of persons in same household, median (IQR)    | 3 (3 to 4)                | 3 (3 to 4)             | 0 (-1 to 1)                             |
| Current smoker – No./n (%)                        | 6/275 (2.2)               | 8 /197 (4.1)           | -1.9 (-5.1 to 1.4)                      |
| BMI (kg/m <sup>2</sup> ) – median (IQR)           | 26.3 (23.0 to 28.9)       | 26.4 (22.7 to 29.0)    | -0.1 (-1.3 to 0.8)                      |
| Coexisting conditions <sup>c</sup> – No. (%)      |                           |                        |                                         |
| Obesity (BMI ≥ 30 kg/m <sup>2</sup> ) – No./n (%) | 55 (20.0)                 | 38 (19.4)              | 0.6 (-6.7 to 7.9)                       |

|                                                                                      |                    |                 |                                   |
|--------------------------------------------------------------------------------------|--------------------|-----------------|-----------------------------------|
| Hypertension                                                                         | 34 (12.4)          | 25 (12.6)       | -0.2 (-6.3 to 5.8)                |
| Diabetes                                                                             | 14 (5.1)           | 12 (6.1)        | -1.0 (-5.2 to 3.2)                |
| Thyroid disease                                                                      | 12 (4.3)           | 8 (4.0)         | -0.3 (-3.3 to 4.0)                |
| Respiratory disease                                                                  | 10 (3.6)           | 6 (3.0)         | -0.6 (-2.6 to 3.9)                |
| Cardiovascular disease                                                               | 7 (2.5)            | 3 (1.5)         | 1.0 (-1.5 to 3.5)                 |
| Any coexisting conditions – No. (%)                                                  | 61 (22.2)          | 38 (19.2)       | 3.0 (-4.4 to 10.3)                |
| Median time (IQR) from symptom onset to randomization – days                         | 5 (4-6)            | 5 (4-6)         | 0 (0 to 0)                        |
| Characteristic                                                                       | Ivermectin (N=275) | Placebo (N=198) | Differences (95% CI) <sup>a</sup> |
| NEWS2 <sup>d</sup> score at randomization – median (IQR)                             | 3 (1-4)            | 3 (2-4)         | 0 (0 to 0)                        |
| Score on ordinal scale at randomization – No. (%)                                    |                    |                 |                                   |
| 1: Not hospitalized and no limitation of activities                                  | 164 (59.6)         | 109 (55.0)      | 4.6 (-4.4 to 13.6)                |
| 2: Not hospitalized, with limitation of activities, home oxygen requirement, or both | 109 (39.6)         | 87 (43.9)       | -4.3 (-13.3 to 4.7)               |
| 3. Hospitalized, not requiring supplemental oxygen                                   | 1 (0.4)            | 1 (0.5)         | -                                 |
| 4. Hospitalized, requiring supplemental oxygen <sup>e</sup>                          | 1 (0.4)            | 1 (0.5)         | -                                 |
| Medications initiated between symptom onset and enrollment – No. (%)                 |                    |                 |                                   |
| NSAIDs                                                                               | 79 (28.7)          | 61 (30.8)       | -2.1 (-10.4 to 6.3)               |
| Other <sup>f</sup>                                                                   | 58 (21.1)          | 38 (19.2)       | 1.9 (-5.4 to 9.2)                 |
| Other antipyretics                                                                   | 37 (13.4)          | 23 (11.6)       | 1.8 (-4.2 to 7.8)                 |
| Macrolides                                                                           | 33 (12.0)          | 22 (11.1)       | 0.9 (-4.9 to 6.7)                 |
| Non-macrolide antibiotics                                                            | 22 (8.0)           | 11 (5.6)        | 2.4 (-2.1 to 7.0)                 |
| Glucocorticoids                                                                      | 7 (2.6)            | 12 (6.1)        | -3.5 (-7.3 to 0.3)                |

|                                            |         |         |                    |
|--------------------------------------------|---------|---------|--------------------|
| Other immunomodulating agents <sup>g</sup> | 4 (1.4) | 2 (1.0) | 0.4 (-1.5 to 2.4)  |
| Anticoagulants                             | 1 (0.4) | 7 (3.5) | -3.2 (-5.8 to 0.5) |

IQR denotes interquartile range and NSAIDs nonsteroidal anti-inflammatory drugs  
n = number with available information

<sup>a</sup> 95% confidence interval for difference in medians estimated by bootstrap sampling and for difference in proportions estimated using the standard normal distribution.

<sup>b</sup> Race/ethnic group was collected by study personnel based on fixed categories as selected by the study participants “Mixed race” refers to an individual of mixed European/Colombian native heritage.

<sup>c</sup> Coexisting conditions were determined by self-report.

<sup>d</sup> NEWS-2 is the National Early Warning Score. It includes six physiological measures; total scores range from 0 to 20, with higher scores indicating greater clinical risk. Score of 3 indicates low clinical risk.

<sup>e</sup> Not high-flow nasal oxygen nor mechanical ventilation

<sup>f</sup> Acyclovir, antidiarrheals, antiemetics, antihistamines, antiparasitics, antispasmodics, antitussives, natural or homeopathic medications, proton pump inhibitors, salbutamol.

<sup>g</sup> Oral interferon and colchicine

**eTable 2. Clinical Manifestations of Patients at Baseline – Primary Analysis Population**

| <b>Characteristic<br/>n (%)</b> | <b>All Participants<br/>(N=398)</b> | <b>Ivermectin<br/>(N=200)</b> | <b>Placebo<br/>(N=198)</b> |
|---------------------------------|-------------------------------------|-------------------------------|----------------------------|
| Myalgia                         | 310 (77.9)                          | 156 (78.0)                    | 154 (77.8)                 |
| Headache                        | 305 (76.6)                          | 156 (78.0)                    | 149 (75.2)                 |
| Fever                           | 172 (43.2)                          | 82 (41.0)                     | 90 (45.5)                  |
| Anosmia/hyposmia                | 223 (56.0)                          | 113 (56.5)                    | 110 (55.6)                 |
| Dysgeusia/hypogeusia            | 199 (50.0)                          | 92 (46.0)                     | 107 (54.0)                 |
| Dry cough                       | 181 (45.5)                          | 83 (41.5)                     | 98 (49.5)                  |
| Rhinitis                        | 160 (40.2)                          | 83 (41.5)                     | 77 (38.9)                  |
| Sore throat                     | 144 (36.2)                          | 80 (40.0)                     | 64 (32.3)                  |
| Diarrhea                        | 98 (24.6)                           | 53 (26.5)                     | 45 (22.7)                  |
| Dyspnea                         | 52 (13.1)                           | 22 (11.0)                     | 30 (15.1)                  |
| Wet cough                       | 30 (7.5)                            | 14 (7.0)                      | 16 (8.1)                   |
| Abdominal pain                  | 19 (7.3)                            | 15 (7.5)                      | 14 (7.1)                   |
| Vomiting                        | 17 (4.3)                            | 5 (2.5)                       | 12 (6.1)                   |
| Skin rash                       | 14 (3.5)                            | 8 (4.0)                       | 6 (3.0)                    |

**eTable 3. Comparison of Demographic and Clinical Characteristics between the 75 Patients Receiving Ivermectin who were Excluded from Primary Analysis due to Error During Product Labeling and the Rest of the Cohort**

| Characteristic                                        | Patients receiving ivermectin during the product-labeling error period (N=75) | Rest of the cohort (N=398) | Differences (95% CI) <sup>a</sup> |
|-------------------------------------------------------|-------------------------------------------------------------------------------|----------------------------|-----------------------------------|
| Age, median (IQR) – yr                                | 39.0 (28.0 to 51.0)                                                           | 37.0 (29.0 to 48.0)        | 2.0 (-0.5 to 9.0)                 |
| Sex – No. (%)                                         |                                                                               |                            |                                   |
| Male                                                  | 34 (45.3)                                                                     | 167 (41.9)                 | 3.4 (-8.9 to 15.6)                |
| Female                                                | 41 (54.7)                                                                     | 231 (58.1)                 | -3.4 (-15.6 to 8.9)               |
| Race or ethnic group <sup>b</sup> – No. (%)           |                                                                               |                            |                                   |
| Mixed Race                                            | 65 (86.7)                                                                     | 357 (89.7)                 | -3.0 (-11.3 to 5.2)               |
| Black or African American                             | 8 (10.7)                                                                      | 32 (8.0)                   | 2.6 (-4.8 to 10.1)                |
| Native Colombian                                      | 2 (2.7)                                                                       | 9 (2.3)                    | 0.4 (-3.5 to 4.3)                 |
| History of BCG vaccination – No./n (%)                | 61/65 (93.8)                                                                  | 367 /394 (93.1)            | 0.7 (-5.6 to 7.0)                 |
| Health Insurance – No. (%)                            |                                                                               |                            |                                   |
| Private/semiprivate                                   | 62 (82.7)                                                                     | 351 (88.2)                 | -5.5 (-14.6 to 3.6)               |
| Government subsidized                                 | 13 (17.3)                                                                     | 42 (10.8)                  | 6.5 (-2.6 to 15.6)                |
| Uninsured                                             | 0 (0.0)                                                                       | 4 (1.0)                    | -                                 |
| Number of persons in the same household, Median (IQR) | 3 (2-4)                                                                       | 4 (3-4)                    | -1 (-1 to 0)                      |
| Current smoker – No. (%)                              | 3 (4.0)                                                                       | 11 (2.8)                   | 1.2 (-3.5 to 5.9)                 |
| Coexisting conditions <sup>c</sup> – No. (%)          |                                                                               |                            |                                   |
| Obesity                                               | 18 (24.0)                                                                     | 75 (18.9)                  | 5.1 (-5.3 to 15.5)                |
| Hypertension                                          | 6 (8.0)                                                                       | 53 (13.3)                  | -5.3 (-12.3 to 1.7)               |
| Thyroid disease                                       | 5 (6.7)                                                                       | 15 (3.8)                   | 2.9 (-3.0. to 8.8)                |
| Respiratory disease                                   | 4 (5.3)                                                                       | 12 (3.0)                   | 2.3 (-3.0 to 7.7)                 |

|                                                                                      |                                                                                      |                                   |                                         |
|--------------------------------------------------------------------------------------|--------------------------------------------------------------------------------------|-----------------------------------|-----------------------------------------|
| Diabetes                                                                             | 4 (5.3)                                                                              | 22 (5.5)                          | -0.2 (-5.7 to 5.4)                      |
| Cardiovascular disease                                                               | 3 (4.0)                                                                              | 7 (1.8)                           | 2.2 (-2.4 to 6.9)                       |
| Cerebrovascular disease                                                              | 0                                                                                    | 0                                 | -                                       |
| Median time (IQR) from symptom onset to randomization – days                         | 6 (5-7)                                                                              | 5 (4-6)                           | 1 (0 to 1)                              |
| NEWS2 <sup>d</sup> score at randomization – median (IQR)                             | 2 (1-3)                                                                              | 3 (2-4)                           | -1 (-1 to 0)                            |
| Score on ordinal scale at randomization – No. (%)                                    |                                                                                      |                                   |                                         |
| 1: Not hospitalized and no limitation of activities                                  | 41 (54.7)                                                                            | 232 (58.3)                        | -3.6 (-15.9 to 8.6)                     |
| 2: Not hospitalized, with limitation of activities, home oxygen requirement, or both | 34 (45.3)                                                                            | 162 (40.7)                        | 4.6 (-7.6 to 16.9)                      |
| <b>Characteristic</b>                                                                | <b>Patients receiving ivermectin during the product-labeling error period (N=75)</b> | <b>Rest of the cohort (N=398)</b> | <b>Differences (95% CI)<sup>c</sup></b> |
| 3. Hospitalized, not requiring supplemental oxygen                                   | 0                                                                                    | 2 (0.5)                           | -                                       |
| 4. Hospitalized, requiring supplemental oxygen <sup>e</sup>                          | 0                                                                                    | 2 (0.5)                           | -                                       |
| Clinical Manifestations at Baseline – No. (%)                                        |                                                                                      |                                   |                                         |
| Myalgias                                                                             | 55 (73.3)                                                                            | 310 (77.9)                        | -4.6 (-15.4 to 6.2)                     |
| Headache                                                                             | 55 (73.3)                                                                            | 305 (76.6)                        | -3.3 (-14.1 to 7.5)                     |
| Anosmia/hyposmia                                                                     | 50 (66.7)                                                                            | 223 (56.0)                        | 10.6 (-1.1 to 22.4)                     |
| Dysgeusia/hypogeusia                                                                 | 44 (58.7)                                                                            | 199 (50.0)                        | 8.7 (-3.5 to 20.1)                      |
| Dry cough                                                                            | 42 (56.0)                                                                            | 181 (45.5)                        | 10.5 (-1.7 to 22.8)                     |
| Fever                                                                                | 37 (49.3)                                                                            | 172 (43.2)                        | 6.1 (-6.2 to 18.4)                      |

|                                                                      |           |            |                      |
|----------------------------------------------------------------------|-----------|------------|----------------------|
| Sore throat                                                          | 29 (38.7) | 144 (36.2) | 2.5 (-9.5 to 14.5)   |
| Diarrhea                                                             | 28 (37.3) | 98 (24.6)  | 12.7 (1.0 to 24.4)   |
| Rhinitis                                                             | 27 (36.0) | 160 (40.2) | -4.2 (-16.1 to 7.7)  |
| Dyspnea                                                              | 12 (16.0) | 52 (13.1)  | 2.9 (-6.0 to 11.9)   |
| Abdominal pain                                                       | 8 (10.7)  | 29 (7.3)   | 3.4 (-4.0 to 10.8)   |
| Wet cough                                                            | 5 (6.7)   | 30 (7.5)   | -0.8 (-7.1 to 5.3)   |
| Vomiting                                                             | 4 (5.3)   | 17 (4.3)   | 1.1 (-4.4 to 6.5)    |
| Skin rash                                                            | 0 (0.0)   | 14 (3.5)   | -3.5 (-5.3 to 1.7)   |
| Medications initiated between symptom onset and enrollment – No. (%) |           |            |                      |
| NSAIDs                                                               | 22 (29.3) | 118 (29.6) | -3.1 (-11.5 to 10.9) |
| Other <sup>f</sup>                                                   | 17 (22.7) | 79 (19.8)  | 2.8 (-7.4 to 13.1)   |
| Other antipyretics                                                   | 11 (14.7) | 49 (12.3)  | 2.3 (-6.3 to 10.9)   |
| Non-macrolide antibiotics                                            | 9 (12.0)  | 24 (6.0)   | 6.0 (-1.7 to 13.7)   |
| Macrolides                                                           | 6 (8.0)   | 49 (12.3)  | -4.3 (-11.2 to 2.6)  |
| Glucocorticoids                                                      | 1 (1.3)   | 18 (4.5)   | -3.2 (-6.5 to 0.1)   |
| Other immunomodulating agents <sup>g</sup>                           | 0 (0.0)   | 6 (1.5)    | -1.5 (-2.7 to 0.3)   |
| Anticoagulants                                                       | 0 (0.0)   | 8 (2.0)    | -2.0 (-3.3 to -0.6)  |

IQR denotes interquartile range and NSAIDs nonsteroidal anti-inflammatory drugs

n = number with available information

<sup>a</sup> 95% confidence interval for difference in medians estimated by bootstrap sampling and for difference in proportions estimated using the standard normal distribution.

<sup>b</sup> Race/ethnic group was collected by study personnel based on fixed categories as selected by the study participants. “Mixed race” refers to an individual of mixed European/Colombian native heritage.

<sup>c</sup> Coexisting conditions were determined by self-report.



<sup>d</sup> NEWS-2 is the National Early Warning Score. It includes six physiological measures; total scores range from 0 to 20, with higher scores indicating greater clinical risk. Score of 3 indicates low clinical risk.

<sup>e</sup> Not high-flow nasal oxygen nor mechanical ventilation

<sup>f</sup> Acyclovir, antidiarrheals, antiemetics, antihistamines, antiparasitics, antispasmodics, antitussives, natural or homeopathic medications, proton pump inhibitors, salbutamol.

<sup>g</sup> Oral interferon and colchicine

**eTable 4. Outcomes – As-Treated Population**

| Characteristic                                                                          | Ivermectin (N=275) | Placebo (N=198) | Absolute Differences (95% CI)      | Effect Estimates (95% CI)                 |
|-----------------------------------------------------------------------------------------|--------------------|-----------------|------------------------------------|-------------------------------------------|
| <b>Primary Outcome: Resolution of symptoms<sup>a</sup></b>                              |                    |                 |                                    |                                           |
| Time to resolution of symptoms – median no. of days (IQR)                               | 10 (9-13)          | 12 (9-13)       | -2 (-3 to 3) <sup>b</sup>          | 1.09 (0.90 to 1.32) <sup>c</sup> [p=0.38] |
| Symptoms resolved at 21 days. No. (%)                                                   | 232 (84.4)         | 156 (78.8)      | 5.57 (-1.56 to 12.71) <sup>d</sup> | 1.45 (0.81 to 2.32) <sup>e</sup>          |
| <b>Secondary Outcomes</b>                                                               |                    |                 |                                    |                                           |
| Deterioration of 2 or more points in an ordinal 8 points scale, <sup>f</sup> No. (%)    | 5 (1.8)            | 7 (3.5)         | -1.72 (-4.73 to 1.30) <sup>d</sup> | 0.50 (0.16 to 1.62) <sup>e</sup>          |
| Fever since randomization, <sup>g</sup> No. (%)                                         | 21 (7.6)           | 21 (10.6)       | -2.97 (-8.28 to 2.34) <sup>d</sup> | 0.70 (0.37 to 1.32) <sup>e</sup>          |
| Median duration of febrile episode, days (IQR)                                          | 1 (1 to 2.5)       | 2 (1-3)         | -1 (-2.0 to 0) <sup>b</sup>        |                                           |
| Escalation of care since randomization, <sup>h</sup> No. (%)                            | 6 (2.2)            | 10 (5.0)        | -2.87 (-6.37 to 0.64) <sup>d</sup> | 0.42 (0.15 to 1.17) <sup>e</sup>          |
| Median duration <sup>i</sup> , days (IQR)                                               | 6.5 (4.5-21.0)     | 6 (3.7-10.7)    | 0.5 (-5.0 to 15.5) <sup>b</sup>    |                                           |
| Escalation of care occurring 12 or more hours since randomization, <sup>h</sup> No. (%) | 6 (2.2)            | 6 (3.0)         | -0.8 (-3.79 to 2.09) <sup>d</sup>  | 0.71 (0.23 to 2.25) <sup>e</sup>          |
| Median duration <sup>i</sup> , days (IQR)                                               | 6.5 (4.5-21)       | 8 (4.2-13.2)    | -1.5 (-7.5 to 15.5) <sup>b</sup>   |                                           |
| Emergency department visits or telemedicine consultations, No. of patients (%)          | 22 (8.0)           | 13 (6.6)        | 1.43 (-3.27 to 6.14) <sup>d</sup>  | 1.24 (0.58 to 2.61) <sup>e</sup>          |
| Deaths, No. (%)                                                                         | 0                  | 1 (0.5)         |                                    |                                           |

<sup>a</sup> Resolution of Symptoms was defined as the first day free of symptoms.

<sup>b</sup> Absolute Difference is the median difference with 95% confidence intervals estimated by bootstrap sampling.

<sup>c</sup> Hazard ratio for resolution of symptoms was estimated by the Cox proportional-hazard model. The P value for this ratio was calculated with the log-rank test.

<sup>d</sup> Absolute Difference is the difference in proportions.

<sup>e</sup> Effect estimate is odds ratio (2-sided 95% CI) from a logistic model.

<sup>f</sup> Ordinal scale: 0 = no clinical evidence of infection; 1 = not hospitalized and no limitation of activities; 2 = not hospitalized, with limitation of activities, home oxygen requirement, or both; 3 = hospitalized, not requiring supplemental oxygen; 4 = hospitalized, requiring supplemental oxygen; 5 = hospitalized, requiring nasal high-flow oxygen, non-invasive mechanical ventilation, or both; 6 = hospitalized, requiring ECMO, invasive mechanical ventilation, or both; 7 = death.

<sup>g</sup> Fever defined as an axillary temperature  $\geq 38$  °C. Patients took their own temperatures while at home.

<sup>h</sup> Escalation of care defined as new-onset hospitalization in the general ward or intensive care unit, or new-onset supplementary oxygen requirement for more than 24 hours

<sup>i</sup> Number of days that patients required hospitalization or supplementary oxygen. If both were required, the longer duration was recorded.

**eTable 5. Ordinal Scale Measure by Treatment Group and Study Visit – Primary Analysis Population**

| Study Visit | Ordinal Scale Measure                                                                                  | All (N=398) |                         |           | Ivermectin (N=200) |      |           | Placebo (N=198) |      |           |
|-------------|--------------------------------------------------------------------------------------------------------|-------------|-------------------------|-----------|--------------------|------|-----------|-----------------|------|-----------|
|             |                                                                                                        | n           | %                       | 95% CI    | n                  | %    | 95% CI    | n               | %    | 95% CI    |
| Day 2       | 0: No Symptoms                                                                                         | 10          | 2.5                     | 1.3–4.6   | 6                  | 3.0  | 1.3–6.5   | 4               | 2.0  | 0.8–5.3   |
|             | 1: Not hospitalized and no limitation of activities                                                    | 221         | 55.5                    | 50.6–60.4 | 112                | 56.0 | 49.0–62.7 | 109             | 55.0 | 48.0–61.9 |
|             | 2: Not hospitalized, with limitation of activities, home oxygen requirement, or both                   | 157         | 39.4                    | 34.7–44.3 | 79                 | 39.5 | 32.9–46.5 | 78              | 39.4 | 32.8–46.4 |
|             | 3. Hospitalized, not requiring supplemental oxygen                                                     | 3           | 0.7                     | 0.2–2.3   | 1                  | 0.5  | 0.1–3.5   | 2               | 1.0  | 0.2–4.0   |
|             | 4. Hospitalized, requiring supplemental oxygen                                                         | 6           | 1.5                     | 0.7–3.3   | 1                  | 0.5  | 0.1–3.5   | 5               | 2.5  | 1.0–5.9   |
|             | 5. Hospitalized, requiring nasal high-flow oxygen therapy, noninvasive mechanical ventilation, or both | 1           | 0.2                     | 0.0–1.8   | 1                  | 0.5  | 0.1–3.5   | 0               | 0    | NA        |
|             | 6. Hospitalized, requiring ECMO, invasive mechanical ventilation, or both                              | 0           | 0                       | NA        | 0                  | 0    | NA        | 0               | 0    | NA        |
|             | 7. Death                                                                                               | 0           | 0                       | NA        | 0                  | 0    | NA        | 0               | 0    | NA        |
|             | <b>Odds Ratio [95%CI]</b>                                                                              |             | <b>1.13 [0.77–1.67]</b> |           |                    |      |           |                 |      |           |
| Day 5       | 0: No Symptoms                                                                                         | 83          | 20.8                    | 17.1–25.1 | 43                 | 21.5 | 16.3–27.7 | 40              | 20.2 | 15.2–26.4 |
|             | 1: Not hospitalized and no limitation of activities                                                    | 198         | 49.7                    | 44.8–54.7 | 102                | 51.0 | 44.1–57.9 | 96              | 48.5 | 41.6–55.4 |
|             | 2: Not hospitalized, with limitation of activities, home oxygen requirement, or both                   | 108         | 27.1                    | 23.0–31.7 | 52                 | 26.0 | 20.4–32.5 | 56              | 28.3 | 22.4–35.0 |
|             | 3. Hospitalized, not requiring supplemental oxygen                                                     | 1           | 0.2                     | 0.0–1.8   | 0                  | 0    | NA        | 1               | 0.5  | 0.1–3.5   |

|       |                                                                                                        |                         |          |               |                               |          |               |                            |          |               |
|-------|--------------------------------------------------------------------------------------------------------|-------------------------|----------|---------------|-------------------------------|----------|---------------|----------------------------|----------|---------------|
|       | 4. Hospitalized, requiring supplemental oxygen                                                         | 4                       | 1.0      | 0.4–2.6       | 1                             | 0.5      | 0.1–3.5       | 3                          | 1.5      | 0.5–4.6       |
|       |                                                                                                        | <b>All<br/>(N=398)</b>  |          |               | <b>Ivermectin<br/>(N=200)</b> |          |               | <b>Placebo<br/>(N=198)</b> |          |               |
|       | <b>Ordinal Scale Measure</b>                                                                           | <b>n</b>                | <b>%</b> | <b>95% CI</b> | <b>n</b>                      | <b>%</b> | <b>95% CI</b> | <b>n</b>                   | <b>%</b> | <b>95% CI</b> |
|       | 5. Hospitalized, requiring nasal high-flow oxygen therapy, noninvasive mechanical ventilation, or both | 2                       | 0.5      | 0.1–2.0       | 1                             | 0.5      | 0.1–3.5       | 1                          | 0.5      | 0.1–3.5       |
|       | 6. Hospitalized, requiring ECMO, invasive mechanical ventilation, or both                              | 2                       | 0.5      | 0.1–2.0       | 1                             | 0.5      | 0.1–3.5       | 1                          | 0.5      | 0.1–3.5       |
|       | 7. Death                                                                                               | 0                       | 0        | NA            | 0                             | 0        | NA            | 0                          | 0        | NA            |
|       | <b>Odds Ratio [95%CI]</b>                                                                              | <b>1.16 [0.80–1.68]</b> |          |               |                               |          |               |                            |          |               |
| Day 8 | 0: No Symptoms                                                                                         | 147                     | 36.9     | 32.3–41.8     | 74                            | 37.0     | 30.6–43.9     | 73                         | 36.9     | 30.4–43.8     |
|       | 1: Not hospitalized and no limitation of activities                                                    | 191                     | 48.0     | 43.1–52.9     | 96                            | 48.0     | 41.1–54.9     | 95                         | 48.0     | 41.1–54.9     |
|       | 2: Not hospitalized, with limitation of activities, home oxygen requirement, or both                   | 52                      | 13.1     | 10.1–16.8     | 26                            | 13.0     | 9.0–18.4      | 26                         | 13.1     | 9.1–18.6      |
|       | 3. Hospitalized, not requiring supplemental oxygen                                                     | 0                       | 0        | NA            | 0                             | 0        | NA            | 0                          | 0        | NA            |
|       | 4. Hospitalized, requiring supplemental oxygen                                                         | 4                       | 1.0      | 0.4–2.6       | 2                             | 1.0      | 0.2–3.9       | 2                          | 1.0      | 0.2–4.0       |
|       | 5. Hospitalized, requiring nasal high-flow oxygen therapy, noninvasive mechanical ventilation, or both | 2                       | 0.5      | 0.1–2.0       | 1                             | 0.5      | 0.1–3.5       | 1                          | 0.5      | 0.1–3.5       |
|       | 6. Hospitalized, requiring ECMO, invasive mechanical ventilation, or both                              | 2                       | 0.5      | 0.1–2.0       | 1                             | 0.5      | 0.1–3.5       | 1                          | 0.5      | 0.1–3.5       |
|       | 7. Death                                                                                               | 0                       | 0        | NA            | 0                             | 0        | NA            | 0                          | 0        | NA            |
|       | <b>Odds Ratio [95%CI]</b>                                                                              | <b>1.01 [0.69–1.46]</b> |          |               |                               |          |               |                            |          |               |

|        |                                                                                                        |                    |          |                         |                           |          |               |                        |          |              |
|--------|--------------------------------------------------------------------------------------------------------|--------------------|----------|-------------------------|---------------------------|----------|---------------|------------------------|----------|--------------|
| Day 11 | 0: No Symptoms                                                                                         | 197                | 49.5     | 44.6–54.4               | 102                       | 51.0     | 44.1–57.9     | 95                     | 48.0     | 41.1–54.9    |
|        | 1: Not hospitalized and no limitation of activities                                                    | 168                | 42.2     | 37.4–47.1               | 82                        | 41.0     | 34.4–48.0     | 86                     | 43.4     | 36.7–50.4    |
|        |                                                                                                        | <b>All (N=398)</b> |          |                         | <b>Ivermectin (N=200)</b> |          |               | <b>Placebo (N=198)</b> |          |              |
|        | <b>Ordinal Scale Measure</b>                                                                           | <b>n</b>           | <b>%</b> | <b>95% CI</b>           | <b>n</b>                  | <b>%</b> | <b>95% CI</b> | <b>n</b>               | <b>%</b> | <b>95%CI</b> |
|        | 2: Not hospitalized, with limitation of activities, home oxygen requirement, or both                   | 26                 | 6.5      | 4.5–9.4                 | 11                        | 5.5      | 3.1–9.7       | 15                     | 7.6      | 4.6–12.2     |
|        | 3. Hospitalized, not requiring supplemental oxygen                                                     | 2                  | 0.5      | 0.1–2.0                 | 2                         | 1.0      | 0.2–3.9       | 0                      | 0        | NA           |
|        | 4. Hospitalized, requiring supplemental oxygen                                                         | 3                  | 0.7      | 0.2–2.3                 | 2                         | 1.0      | 0.2–3.9       | 1                      | 0.5      | 0.1–3.5      |
|        | 5. Hospitalized, requiring nasal high-flow oxygen therapy, noninvasive mechanical ventilation, or both | 1                  | 0.2      | 0.0–1.8                 | 0                         | 0        | NA            | 1                      | 0.5      | 0.1–3.5      |
|        | 6. Hospitalized, requiring ECMO, invasive mechanical ventilation, or both                              | 1                  | 0.2      | 0.0–1.8                 | 1                         | 0.5      |               | 0                      | 0        | NA           |
|        | 7. Death                                                                                               | 0                  | 0        | NA                      | 0                         | 0        | NA            | 0                      | 0        | NA           |
|        | <b>Odds Ratio [95%CI]</b>                                                                              |                    |          | <b>1.11 [0.76–1.63]</b> |                           |          |               |                        |          |              |
| Day 15 | 0: No Symptoms                                                                                         | 246                | 61.8     | 56.9–66.5               | 126                       | 63.0     | 56.1–69.4     | 120                    | 60.6     | 53.6–67.2    |
|        | 1: Not hospitalized and no limitation of activities                                                    | 139                | 34.9     | 30.4–39.8               | 67                        | 33.5     | 27.3–40.3     | 72                     | 36.4     | 29.9–43.3    |
|        | 2: Not hospitalized, with limitation of activities, home oxygen requirement, or both                   | 9                  | 2.3      | 1.2–4.3                 | 5                         | 2.5      | 1.0–5.9       | 4                      | 2.0      | 0.8–5.3      |
|        | 3. Hospitalized, not requiring supplemental oxygen                                                     | 1                  | 0.2      | 0.0–1.8                 | 1                         | 0.5      | 0.1–3.5       | 0                      | 0.0      | NA           |
|        | 4. Hospitalized, requiring supplemental oxygen                                                         | 1                  | 0.2      | 0.0–1.8                 | 0                         | 0        | NA            | 1                      | 0.50     | 0.1–3.5      |

|        |                                                                                                        |                         |          |               |                           |          |               |                        |          |               |
|--------|--------------------------------------------------------------------------------------------------------|-------------------------|----------|---------------|---------------------------|----------|---------------|------------------------|----------|---------------|
|        | 5. Hospitalized, requiring nasal high-flow oxygen therapy, noninvasive mechanical ventilation, or both | 0                       | 0        | NA            | 0                         | 0        | NA            | 0                      | 0        | NA            |
|        | 6. Hospitalized, requiring ECMO, invasive mechanical ventilation, or both                              | 1                       | 0.2      | 0.0–1.8       | 1                         | 0.5      | 0.1–3.5       | 0                      | 0        | NA            |
|        | 7. Death                                                                                               | 1                       | 0.2      | 0.0–1.8       | 0                         | 0        | NA            | 1                      | 0.5      | 0.1–3.5       |
|        | <b>Odds Ratio [95%CI]</b>                                                                              | <b>1.09 [0.73–1.63]</b> |          |               |                           |          |               |                        |          |               |
|        |                                                                                                        | <b>All (N=398)</b>      |          |               | <b>Ivermectin (N=200)</b> |          |               | <b>Placebo (N=198)</b> |          |               |
|        | <b>Ordinal Scale Measure</b>                                                                           | <b>n</b>                | <b>%</b> | <b>95% CI</b> | <b>n</b>                  | <b>%</b> | <b>95% CI</b> | <b>n</b>               | <b>%</b> | <b>95% CI</b> |
| Day 21 | 0: No Symptoms                                                                                         | 320                     | 80.4     | 76.2–84.0     | 164                       | 82.0     | 76.0–86.7     | 156                    | 78.8     | 72.5–83.9     |
|        | 1: Not hospitalized and no limitation of activities                                                    | 69                      | 17.3     | 13.9–21.4     | 32                        | 16.0     | 11.5–21.8     | 37                     | 18.7     | 13.8–24.7     |
|        |                                                                                                        |                         |          |               |                           |          |               |                        |          |               |
|        | 2: Not hospitalized, with limitation of activities, home oxygen requirement, or both                   | 6                       | 1.5      | 0.7–3.3       | 2                         | 1.0      | 0.2–3.9       | 4                      | 2.0      | 0.8–5.3       |
|        | 3. Hospitalized, not requiring supplemental oxygen                                                     | 0                       | 0        | NA            | 0                         | 0        | NA            | 0                      | 0        | NA            |
|        | 4. Hospitalized, requiring supplemental oxygen                                                         | 0                       | 0        | NA            | 0                         | 0        | NA            | 0                      | 0        | NA            |
|        | 5. Hospitalized, requiring nasal high-flow oxygen therapy, noninvasive mechanical ventilation, or both | 0                       | 0        | NA            | 0                         | 0        | NA            | 0                      | 0        | NA            |
|        | 6. Hospitalized, requiring ECMO, invasive mechanical ventilation, or both                              | 2                       | 0.5      | 0.1–2.0       | 2                         | 1.0      | 0.2–3.9       | 0                      | 0        | NA            |
|        | 7. Death                                                                                               | 1                       | 0.2      | 0.0–1.8       | 0                         | 0        | NA            | 1                      | 0.5      | 0.1–3.5       |
|        | <b>Odds Ratio [95%CI]</b>                                                                              | <b>1.23 [0.75–2.01]</b> |          |               |                           |          |               |                        |          |               |

N = Number of Participants in the Primary Analysis Population.

n = Number of participants with the respective score

**eTable 6. Ordinal Scale Measure by Treatment Group and Study Visit – As-Treated Population**

| Study Visit | Ordinal Scale Measure                                                                                  | All (N=473) |                         |           | Ivermectin (N=275) |                   |           | Placebo (N=198) |                |           |
|-------------|--------------------------------------------------------------------------------------------------------|-------------|-------------------------|-----------|--------------------|-------------------|-----------|-----------------|----------------|-----------|
|             |                                                                                                        | n           | %                       | 95% CI    | n                  | %                 | 95% CI    | n               | %              | 95% CI    |
| Day 2       | 0: No Symptoms                                                                                         | 10          | 2.1                     | 1.1–3.9   | 6                  | 2.2               | 0.9–4.8   | 4               | 2.0            | 0.8–5.3   |
|             | 1: Not hospitalized and no limitation of activities                                                    | 268         | 56.7                    | 52.1–61.1 | 159                | 57.8              | 51.9–63.5 | 109             | 55.0           | 48.0–61.9 |
|             | 2: Not hospitalized, with limitation of activities, home oxygen requirement, or both                   | 185         | 39.1                    | 34.8–43.6 | 107                | 38.9              | 33.3–44.8 | 78              | 39.4           | 32.8–46.4 |
|             | 3. Hospitalized, not requiring supplemental oxygen                                                     | 3           | 0.6                     | 0.2–1.9   | 1                  | 0.4               | 0.0–2.6   | 2               | 1.0            | 0.2–4.0   |
|             | 4. Hospitalized, requiring supplemental oxygen                                                         | 6           | 1.3                     | 0.6–2.8   | 1                  | 0.4               | 0.0–2.6   | 5               | 2.5            | 1.0–5.9   |
|             | 5. Hospitalized, requiring nasal high-flow oxygen therapy, noninvasive mechanical ventilation, or both | 1           | 0                       | 0.0–1.5   | 1                  | 0.4               | 0.0–2.6   | 0               | 0              | NA        |
|             | 6. Hospitalized, requiring ECMO, invasive mechanical ventilation, or both                              | 0           | 0                       | NA        | 0                  | 0                 | NA        | 0               | 0              | NA        |
|             | 7. Death                                                                                               | 0           | 0                       | NA        | 0                  | 0                 | NA        | 0               | 0              | NA        |
|             | <b>Odds Ratio [95%CI]</b>                                                                              |             | <b>1.17 [0.81–1.68]</b> |           |                    |                   |           |                 |                |           |
| Day 5       | 0: No Symptoms                                                                                         | 93          | 19.7                    | 16.3–23.5 | 53                 | 19.3              | 15.0–24.4 | 40              | 20.2           | 15.2–26.4 |
|             | 1: Not hospitalized and no limitation of activities                                                    | 245         | 51.8                    | 47.3–56.3 | 149                | 54.2              | 48.2–60.0 | 96              | 48.5           | 41.6–55.4 |
|             | 2: Not hospitalized, with limitation of activities, home oxygen requirement, or both                   | 125         | 26.4                    | 22.6–30.6 | 69                 | 25.1              | 20.3–30.6 | 56              | 28.3           | 22.4–35.0 |
|             | 3. Hospitalized, not requiring supplemental oxygen                                                     | 1           | 0.2                     | 0.0–1.5   | 0                  | 0                 | NA        | 1               | 0.5            | 0.1–3.5   |
|             |                                                                                                        |             | <b>All</b>              |           |                    | <b>Ivermectin</b> |           |                 | <b>Placebo</b> |           |

|        | Ordinal Scale Measure                                                                                  | (N=473)                 |          |               | (N=275)                   |          |               | (N=198)                |          |               |
|--------|--------------------------------------------------------------------------------------------------------|-------------------------|----------|---------------|---------------------------|----------|---------------|------------------------|----------|---------------|
|        |                                                                                                        | n                       | %        | 95% CI        | n                         | %        | 95% CI        | n                      | %        | 95% CI        |
|        | 4. Hospitalized, requiring supplemental oxygen                                                         | 5                       | 1.1      | 0.4–2.5       | 2                         | 0.7      | 0.2–2.9       | 3                      | 1.5      | 0.5–4.6       |
|        | 5. Hospitalized, requiring nasal high-flow oxygen therapy, noninvasive mechanical ventilation, or both | 2                       | 0.4      | 0.1–1.7       | 1                         | 0.4      | 0.0–2.6       | 1                      | 0.5      | 0.1–3.5       |
|        | 6. Hospitalized, requiring ECMO, invasive mechanical ventilation, or both                              | 2                       | 0.4      | 0.1–1.7       | 1                         | 0.4      | 0.0–2.6       | 1                      | 0.5      | 0.1–3.5       |
|        | 7. Death                                                                                               | 0                       | 0        | NA            | 0                         | 0        | NA            | 0                      | 0        | NA            |
|        | <b>Odds Ratio [95%CI]</b>                                                                              | <b>1.13 [0.80–1.61]</b> |          |               |                           |          |               |                        |          |               |
| Day 8  | 0: No Symptoms                                                                                         | 175                     | 37.0     | 32.7–41.5     | 102                       | 37.1     | 31.6–43.0     | 73                     | 36.9     | 30.4–43.8     |
|        | 1: Not hospitalized and no limitation of activities                                                    | 231                     | 48.8     | 44.3–53.3     | 136                       | 49.4     | 43.6–55.4     | 95                     | 48.0     | 41.1–54.9     |
|        | 2: Not hospitalized, with limitation of activities, home oxygen requirement, or both                   | 57                      | 12.0     | 9.4–15.3      | 31                        | 11.3     | 8.0–15.6      | 26                     | 13.1     | 9.1–18.6      |
|        | 3. Hospitalized, not requiring supplemental oxygen                                                     | 2                       | 0.4      | 0.1–1.7       | 2                         | 0.7      | 0.2–2.9       | 0                      | 0        | NA            |
|        | 4. Hospitalized, requiring supplemental oxygen                                                         | 4                       | 0.8      | 0.3–2.2       | 2                         | 0.8      | 0.2–2.9       | 2                      | 1.0      | 0.2–4.0       |
|        | 5. Hospitalized, requiring nasal high-flow oxygen therapy, noninvasive mechanical ventilation, or both | 2                       | 0.4      | 0.1–1.7       | 1                         | 0.4      | 0.0–2.6       | 1                      | 0.5      | 0.1–3.5       |
|        | 6. Hospitalized, requiring ECMO, invasive mechanical ventilation, or both                              | 2                       | 0.4      | 0.1–1.7       | 1                         | 0.4      | 0.0–2.6       | 1                      | 0.5      | 0.1–3.5       |
|        | 7. Death                                                                                               | 0                       | 0        | NA            | 0                         | 0        | NA            | 0                      | 0        | NA            |
|        | <b>Odds Ratio [95%CI]</b>                                                                              | <b>1.04 [0.74–1.48]</b> |          |               |                           |          |               |                        |          |               |
| Day 11 | 0: No Symptoms                                                                                         | 231                     | 48.8     | 44.3–53.3     | 136                       | 49.4     | 41.1–54.9     | 95                     | 48.0     | 41.1–54.9     |
|        |                                                                                                        | <b>All (N=473)</b>      |          |               | <b>Ivermectin (N=275)</b> |          |               | <b>Placebo (N=198)</b> |          |               |
|        | <b>Ordinal Scale Measure</b>                                                                           | <b>n</b>                | <b>%</b> | <b>95% CI</b> | <b>n</b>                  | <b>%</b> | <b>95% CI</b> | <b>n</b>               | <b>%</b> | <b>95% CI</b> |



|                                                                           |                                                                                                        |                         |                    |               |          |                           |               |          |                        |               |  |
|---------------------------------------------------------------------------|--------------------------------------------------------------------------------------------------------|-------------------------|--------------------|---------------|----------|---------------------------|---------------|----------|------------------------|---------------|--|
|                                                                           | 1: Not hospitalized and no limitation of activities                                                    | 206                     | 43.5               | 39.1–48.1     | 120      | 43.6                      | 37.9–49.6     | 86       | 43.4                   | 36.7–50.4     |  |
|                                                                           | 2: Not hospitalized, with limitation of activities, home oxygen requirement, or both                   | 29                      | 6.1                | 4.3–8.7       | 14       | 5.1                       | 3.0–8.4       | 15       | 7.6                    | 4.6–12.2      |  |
|                                                                           | 3. Hospitalized, not requiring supplemental oxygen                                                     | 2                       | 0.4                | 0.1–1.7       | 2        | 0.7                       | 0.2–2.9       | 0        | 0                      | NA            |  |
|                                                                           | 4. Hospitalized, requiring supplemental oxygen                                                         | 3                       | 0.6                | 0.2–1.9       | 2        | 0.7                       | 0.2–2.9       | 1        | 0.5                    | 0.1–3.5       |  |
|                                                                           | 5. Hospitalized, requiring nasal high-flow oxygen therapy, noninvasive mechanical ventilation, or both | 1                       | 0.2                | 0.0–1.5       | 0        | 0                         | NA            | 1        | 0.5                    | 0.1–3.5       |  |
|                                                                           | 6. Hospitalized, requiring ECMO, invasive mechanical ventilation, or both                              | 1                       | 0.2                | 0.0–1.5       | 1        | 0.4                       | 0.0–2.6       | 0        | 0                      | NA            |  |
|                                                                           | 7. Death                                                                                               | 0                       | 0                  | NA            | 0        | 0                         | NA            | 0        | 0                      | NA            |  |
|                                                                           | <b>Odds Ratio [95%CI]</b>                                                                              | <b>1.08 [0.76–1.54]</b> |                    |               |          |                           |               |          |                        |               |  |
| Day 15                                                                    | 0: No Symptoms                                                                                         | 286                     | 60.5               | 56.0–64.8     | 166      | 60.4                      | 54.4–66.0     | 120      | 60.6                   | 53.6–67.2     |  |
|                                                                           | 1: Not hospitalized and no limitation of activities                                                    | 174                     | 36.8               | 32.5–41.2     | 102      | 37.1                      | 31.6–43.0     | 72       | 36.4                   | 29.9–43.3     |  |
|                                                                           | 2: Not hospitalized, with limitation of activities, home oxygen requirement, or both                   | 9                       | 1.9                | 1.0–3.6       | 5        | 1.8                       | 0.8–4.3       | 4        | 2.0                    | 0.8–5.3       |  |
|                                                                           | 3. Hospitalized, not requiring supplemental oxygen                                                     | 1                       | 0.2                | 0.0–1.5       | 1        | 0.4                       | 0.0–2.6       | 0        | 0.0                    | NA            |  |
|                                                                           | 4. Hospitalized, requiring supplemental oxygen                                                         | 1                       | 0.2                | 0.0–1.5       | 0        | 0.0                       | NA            | 1        | 0.50                   | 0.1–3.5       |  |
|                                                                           | 5. Hospitalized, requiring nasal high-flow oxygen therapy, noninvasive mechanical ventilation, or both | 0                       | 0                  | NA            | 0        | 0                         | NA            | 0        | 0                      | NA            |  |
|                                                                           |                                                                                                        |                         | <b>All (N=473)</b> |               |          | <b>Ivermectin (N=275)</b> |               |          | <b>Placebo (N=198)</b> |               |  |
|                                                                           | <b>Ordinal Scale Measure</b>                                                                           | <b>n</b>                | <b>%</b>           | <b>95% CI</b> | <b>n</b> | <b>%</b>                  | <b>95% CI</b> | <b>n</b> | <b>%</b>               | <b>95% CI</b> |  |
| 6. Hospitalized, requiring ECMO, invasive mechanical ventilation, or both | 1                                                                                                      | 0.2                     | 0.0–1.5            | 1             | 0.4      | 0.0–2.6                   | 0             | 0        | NA                     |               |  |

|        |                                                                                                        |                         |      |           |     |      |           |     |      |           |
|--------|--------------------------------------------------------------------------------------------------------|-------------------------|------|-----------|-----|------|-----------|-----|------|-----------|
|        | 7. Death                                                                                               | 1                       | 0.2  | 0.0–1.5   | 0   | 0    | NA        | 1   | 0.5  | 0.1–3.5   |
|        | <b>Odds Ratio [95%CI]</b>                                                                              | <b>1.00 [0.69–1.45]</b> |      |           |     |      |           |     |      |           |
| Day 21 | 0: No Symptoms                                                                                         | 388                     | 82.0 | 78.3–85.2 | 232 | 84.4 | 79.6–88.2 | 156 | 78.8 | 72.5–83.9 |
|        | 1: Not hospitalized and no limitation of activities                                                    | 76                      | 16.1 | 13.0–19.7 | 39  | 14.2 | 10.5–18.8 | 37  | 18.7 | 13.8–24.7 |
|        | 2: Not hospitalized, with limitation of activities, home oxygen requirement, or both                   | 6                       | 1.3  | 0.6-2.8   | 2   | 0.7  | 0.2–2.9   | 4   | 2.0  | 0.8–5.3   |
|        | 3. Hospitalized, not requiring supplemental oxygen                                                     | 0                       | 0    | NA        | 0   | 0    | NA        | 0   | 0    | NA        |
|        | 4. Hospitalized, requiring supplemental oxygen                                                         | 0                       | 0    | NA        | 0   | 0    | NA        | 0   | 0    | NA        |
|        | 5. Hospitalized, requiring nasal high-flow oxygen therapy, noninvasive mechanical ventilation, or both | 0                       | 0    | NA        | 0   | 0    | NA        | 0   | 0    | NA        |
|        | 6. Hospitalized, requiring ECMO, invasive mechanical ventilation, or both                              | 2                       | 0.4  | 0.1–1.7   | 2   | 0.7  | 0.2–2.9   | 0   | 0    | NA        |
|        | 7. Death                                                                                               | 1                       | 0.2  | 0.0–1.5   | 0   | 0    | NA        | 1   | 0.5  | 0.1–3.5   |
|        | <b>Odds Ratio [95%CI]</b>                                                                              | <b>1.46 [0.91–2.34]</b> |      |           |     |      |           |     |      |           |

N = Number of Participants in the As-Treated Population.  
n = Number of participants with the respective score.

**eTable 7. Summary of Adverse Events – As-Treated Population**

| Event                                                                        | Ivermectin<br>(N=275)  | Placebo<br>(N=198)     |
|------------------------------------------------------------------------------|------------------------|------------------------|
|                                                                              | Any Grade <sup>a</sup> | Any Grade <sup>a</sup> |
| <b>Solicited Adverse Events<sup>b</sup></b>                                  |                        |                        |
| Headache, No. (%)                                                            | 140 (50.9)             | 111 (56.1)             |
| Median duration, Days (IQR)                                                  | 2 (1-5)                | 2 (1-5)                |
| Dizziness, No. (%)                                                           | 98 (35.6)              | 68 (34.3)              |
| Median duration, Days (IQR)                                                  | 2 (1-4)                | 2 (1-3.7)              |
| Diarrhea, No. (%)                                                            | 83 (30.2)              | 65 (32.8)              |
| Median duration, Days (IQR)                                                  | 2 (1-4)                | 2 (1-3)                |
| Nausea, No. (%)                                                              | 66 (24.0)              | 47 (23.7)              |
| Median duration, Days (IQR)                                                  | 1 (1-3)                | 2 (1-4)                |
| Abdominal pain, No. (%)                                                      | 55 (20.0)              | 49 (24.7)              |
| Median duration, Days (IQR)                                                  | 2 (1-4)                | 2 (1-3)                |
| Disturbances of vision, No. (%)                                              | 44 (16.0)              | 28 (14.1)              |
| Median duration, Days (IQR)                                                  | 2 (1-3)                | 2 (1-4.7)              |
| Photophobia, No. (%)                                                         | 9 (3.3)                | 4 (2.0)                |
| Blurry Vision, No. (%)                                                       | 31 (11.3)              | 23 (11.6)              |
| Reduction in visual acuity, No. (%)                                          | 5 (1.8)                | 2 (1.0)                |
| Skin rash, No. (%)                                                           | 17 (6.2)               | 19 (9.6)               |
| Median duration, Days (IQR)                                                  | 4 (3-7)                | 4 (1-8)                |
| Tremor, No. (%)                                                              | 17 (6.2)               | 6 (3.0)                |
| Median duration, Days (IQR)                                                  | 1 (1-7)                | 3.5 (1-6.5)            |
| Skin Discoloration, No. (%)                                                  | 13 (6.5)               | 4 (2.0)                |
| Median duration, Days (IQR)                                                  | 3 (1.7-5.2)            | 4 (2.5-13)             |
| Swelling, No. (%)                                                            | 7 (2.5)                | 3 (1.5)                |
| Median duration, Days (IQR)                                                  | 2 (1-4)                | 1 (1-1)                |
| Vomiting, No. (%)                                                            | 6 (2.2)                | 6 (3.0)                |
| Median duration, Days (IQR)                                                  | 1 (1-3)                | 1 (1-1.5)              |
| <b>Number of patients with one or more solicited adverse Events, No. (%)</b> | 211 (76.7)             | 161 (81.3)             |
| Adverse Events Leading to Treatment Discontinuation, No. (%)                 | 20 (7.3)               | 5 (2.5)                |

**eTable 7. Summary of Adverse Events – As-Treated Population (continued)**

| Event                                                                     | Ivermectin<br>(N=275)  | Placebo<br>(N=198)     |
|---------------------------------------------------------------------------|------------------------|------------------------|
|                                                                           | Any Grade <sup>a</sup> | Any Grade <sup>a</sup> |
| <b>Serious Adverse Events<sup>c</sup>, No. (%)</b>                        |                        |                        |
| Respiratory Failure                                                       | 2 (0.7)                | 1 (0.5)                |
| Acute Kidney Injury <sup>d</sup>                                          | 2 (0.7)                | 1 (0.5)                |
| Multi-organ failure <sup>e</sup>                                          | 2 (0.7)                | 2 (1.0)                |
| Gastrointestinal Hemorrhage                                               | 2 (0.7)                | 0 (0)                  |
| Sepsis <sup>f</sup>                                                       | 1 (0.4)                | 1 (0.5)                |
| <b>Number of patients with one or more Serious Adverse Event, No. (%)</b> | 2 (0.7)                | 2 (1.0)                |

IQR denotes interquartile range.

<sup>a</sup> Grade refers to the severity of the adverse event determined according to the following: Grade 1 Mild; asymptomatic or mild symptoms; clinical or diagnostic observations only; intervention not indicated. Grade 2 Moderate; minimal, local or noninvasive intervention indicated; limiting age- appropriate instrumental activities of daily living (ADL). Grade 3 Severe or medically significant but not immediately life-threatening; hospitalization or prolongation of hospitalization indicated; disabling; limiting self care ADL. Grade 4 Life-threatening consequences; urgent intervention indicated. Grade 5 Death related to AE.

Grade 3 solicited adverse events: Headache, N=1 in the placebo group, duration of 6 days. Dizziness, N=1 in the ivermectin group, duration of 6 days; N=3 in the placebo group, median duration of 2 days (IQR, 1-8). Skin rash, N=2 in the ivermectin group, median duration of 8 days (IQR, 7-9). No grade 4 events occurred.

<sup>b</sup> Adverse Events were solicited by phone at each follow-up call.

<sup>c</sup> Serious adverse events were severe, medically significant or life-threatening conditions occurring in study patients documented from revision of patient’s electronic medical records. All were grade 3 or 4, except 1 patient in the placebo group who had grade 5 respiratory failure, acute kidney injury, multi-organ failure and sepsis.

<sup>d</sup> A disorder characterized by the acute loss of renal function

<sup>e</sup> A disorder characterized by progressive deterioration of the lungs, liver, kidney and clotting mechanisms.

<sup>f</sup> A disorder characterized by the presence of pathogenic microorganisms in the blood stream.

**eFigure 1. Time to Resolution of Symptoms – As-Treated Population According to the Type of Placebo**

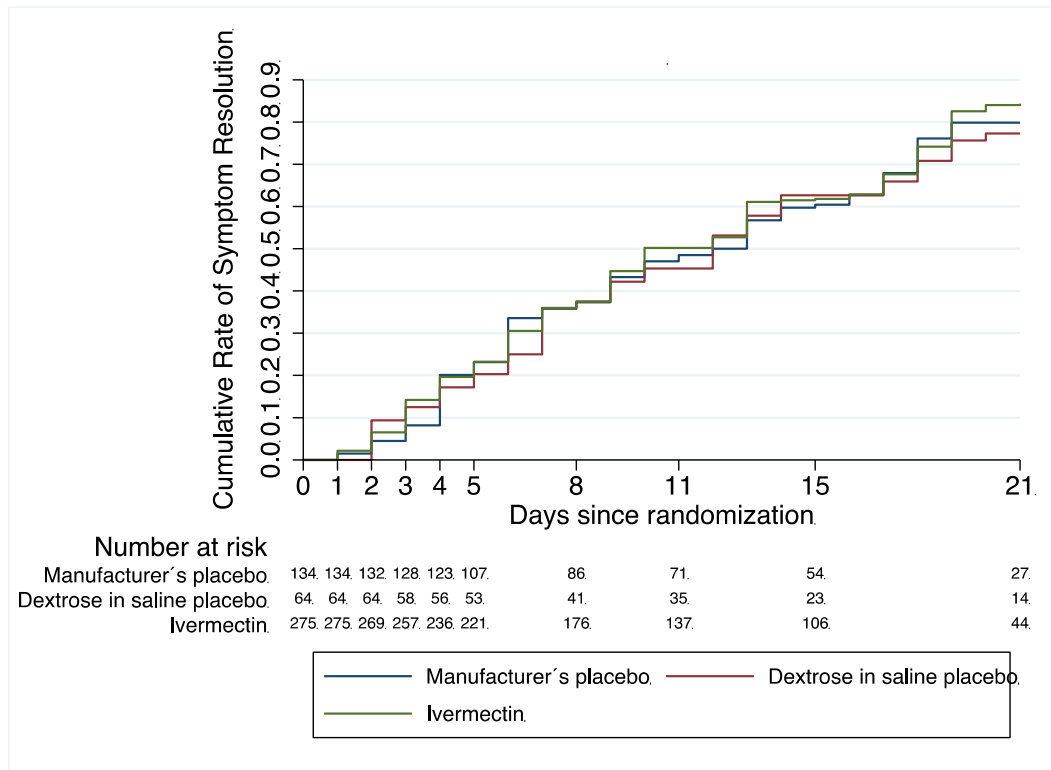

The cumulative rate of symptom resolution is the percentage of patients who experienced their first day free of symptoms. Hazard ratio of symptom resolution in the ivermectin vs. dextrose in saline placebo group: 1.14 (95% CI, 0.83-1.55); hazard ratio of symptom resolution in the ivermectin vs. manufacturer's placebo: 1.07 (95% CI 0.85-1.34).

**eFigure 2. Time to Resolution of Symptoms – As-Treated Population**

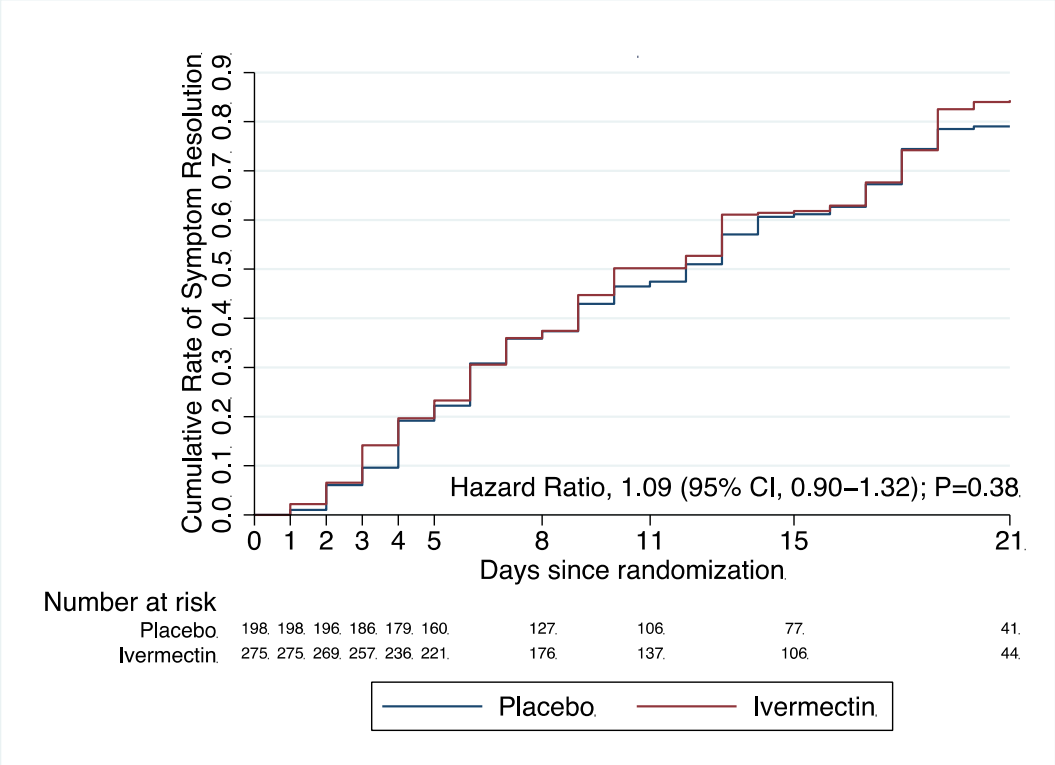

The cumulative rate of symptom resolution is the percentage of patients who experienced their first day free of symptoms.

**eFigure 3. Clinical Status on an 8-Point Ordinal Scale on Study Days 5, 8, 11 and 21 by Treatment Group – Primary Analysis Population**

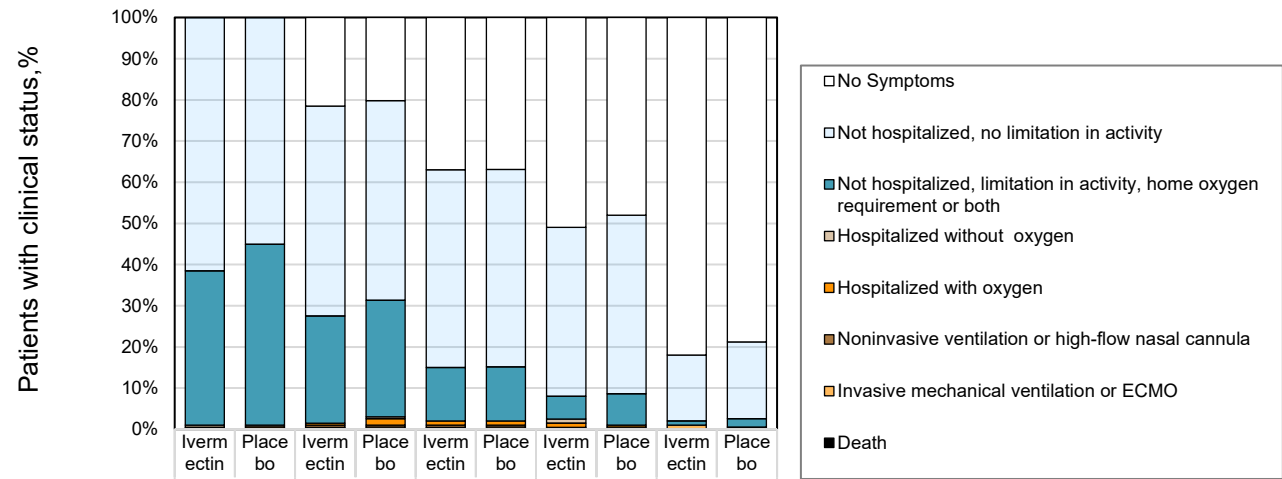

|                                                                             | Day 0      |         | Day 5      |         | Day 8      |         | Day 11     |         | Day 21     |         |
|-----------------------------------------------------------------------------|------------|---------|------------|---------|------------|---------|------------|---------|------------|---------|
|                                                                             | Ivermectin | Placebo |
| □ No Symptoms                                                               | 0.0%       | 0.0%    | 21.5%      | 20.2%   | 37.0%      | 36.9%   | 51.0%      | 48.0%   | 82.0%      | 78.8%   |
| □ Not hospitalized, no limitation in activity                               | 61.5%      | 55.1%   | 51.0%      | 48.5%   | 48.0%      | 48.0%   | 41.0%      | 43.4%   | 16.0%      | 18.7%   |
| ■ Not hospitalized, limitation in activity, home oxygen requirement or both | 37.5%      | 43.9%   | 26.0%      | 28.3%   | 13.0%      | 13.1%   | 5.5%       | 7.6%    | 1.0%       | 2.0%    |
| □ Hospitalized without oxygen                                               | 0.5%       | 0.5%    | 0.0%       | 0.5%    | 0.0%       | 0.0%    | 1.0%       | 0.0%    | 0.0%       | 0.0%    |
| ■ Hospitalized with oxygen                                                  | 0.5%       | 0.5%    | 0.5%       | 1.5%    | 1.0%       | 1.0%    | 1.0%       | 0.5%    | 0.0%       | 0.0%    |
| ■ Noninvasive ventilation or high-flow nasal cannula                        | 0.0%       | 0.0%    | 0.5%       | 0.5%    | 0.5%       | 0.5%    | 0.0%       | 0.5%    | 0.0%       | 0.0%    |
| ■ Invasive mechanical ventilation or ECMO                                   | 0.0%       | 0.0%    | 0.5%       | 0.5%    | 0.5%       | 0.5%    | 0.5%       | 0.0%    | 1.0%       | 0.0%    |
| ■ Death                                                                     | 0.0%       | 0.0%    | 0.0%       | 0.0%    | 0.0%       | 0.0%    | 0.0%       | 0.0%    | 0.0%       | 0.5%    |

**Day 5: OR [95%CI]: 1.16 [0.80-1.68]**  
**Day 8: OR [95%CI]: 1.01 [0.69-1.46]**  
**Day 11: OR [95%CI]: 1.11 [0.76-1.63]**  
**Day 21: OR [95%CI]: 1.23 [0.75-2.01]**

Odds ratios greater than 1 indicate benefit with ivermectin. All percentage values and their 95% confidence intervals in each category are provided in eTable 5.
