# Supplementary material
Source: PubMed Central journal article supplement (PMC7934083)
Supplement: jama-e213071-s003.pdf [file jama-e213071-s003.pdf]

# Data Sharing Statement

López-Medina. Effect of Ivermectin on Time to Resolution of Symptoms Among Adults With Mild COVID-19. *JAMA*. Published March 04, 2021. doi:10.1001/jama.2021.3071

## Data

**Data available:** Yes

**Data types:** Deidentified participant data, Data dictionary

**How to access data:** [ceip.administrativo@ceiponline.org](mailto:ceip.administrativo@ceiponline.org)

**When available:** With publication

## Supporting Documents

**Document types:** Statistical/analytic code

**How to access documents:** [ceip.administrativo@ceiponline.org](mailto:ceip.administrativo@ceiponline.org)

**When available:** With publication

## Additional Information

**Who can access the data:** Researchers whose proposed use of the data has been approved and agreed upon by both principal investigators

**Types of analyses:** To further explore the efficacy of ivermectin for the treatment of COVID-19

**Mechanisms of data availability:** With a signed data access agreement
